# Supplementary material for: Small-scale (sub-organ and cellular level) alpha-particle dosimetry methods using an iQID digital autoradiography imaging system
Source: PubMed Central journal article supplement (PMC9606121; doi:10.1038/s41598-022-22664-5), 2022-10-26
Supplement: 41598_2022_22664_MOESM1_ESM.pdf [file 41598_2022_22664_MOESM1_ESM.pdf]

**Supplementary Information for**  
**Small-Scale (Sub-Organ and Cellular Level) Alpha-Particle Dosimetry Methods**  
**using an iQID Digital Autoradiography Imaging System**

R. Peter, B.M. Sandmaier, M.P. Dion, S.H.L. Frost, E.B. Santos, A. Kenoyer, D.K. Hamlin,  
D.S. Wilbur, R.D. Stewart, D.R. Fisher, K. Vetter, Y. Seo, and B.W. Miller

**SUPPLEMENTAL TABLE S1.** Dogs treated with  $^{211}\text{At}$ -anti-CD45 radioimmunotherapy.

| <b>Canine ID</b>  | <b>Subject Weight (kg)</b> | <b>Injected <math>^{211}\text{At}</math> Activity (MBq/kg)</b> | <b>Antibody Dose (mAb mg/kg)</b> | <b>Specific Activity (MBq <math>^{211}\text{At}</math>/mg mAb)</b> |
|-------------------|----------------------------|----------------------------------------------------------------|----------------------------------|--------------------------------------------------------------------|
| H695              | 12.4                       | 8.44                                                           | 0.50                             | 16.9                                                               |
| H700              | 13.0                       | 23.2                                                           | 0.75                             | 30.9                                                               |
| H707              | 9.7                        | 14.1                                                           | 0.75                             | 18.7                                                               |
| H714              | 10.1                       | 14.5                                                           | 0.50                             | 29.0                                                               |
| H719              | 7.9                        | 13.7                                                           | 0.75                             | 18.2                                                               |
| H741 <sup>a</sup> | 12.3                       | 14.0                                                           | 0.50                             | 28.0                                                               |
| H751              | 9.5                        | 12.9                                                           | 0.50                             | 25.8                                                               |
| H764              | 10.9                       | 14.6                                                           | 0.50                             | 29.2                                                               |
| H765              | 9.6                        | 11.4                                                           | 0.50                             | 22.7                                                               |

<sup>a</sup>Biopsies from this study were discarded from analysis because torn and folded samples outnumbered usable samples.
